# Supplementary material for: Preliminary Study of MR Diffusion Tensor Imaging of the Liver for the Diagnosis of Hepatocellular Carcinoma
Source: PLOS journal article supplement (doi:10.1371/journal.pone.0135568), 2015-08-28

**Fig 2. Example of measurements in HCC patients.**

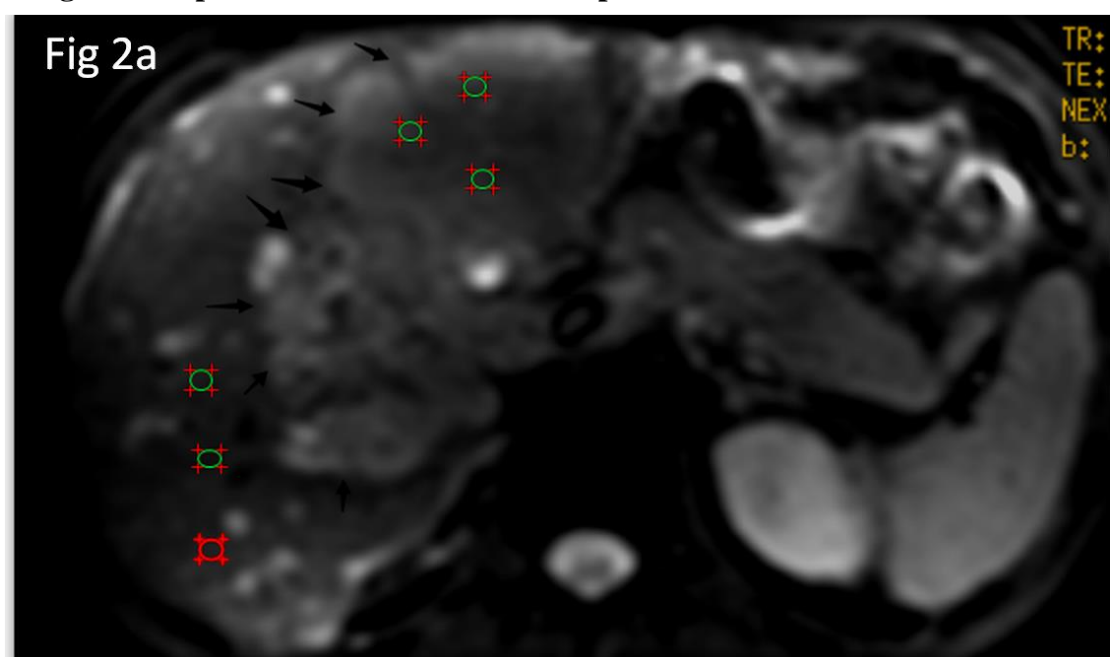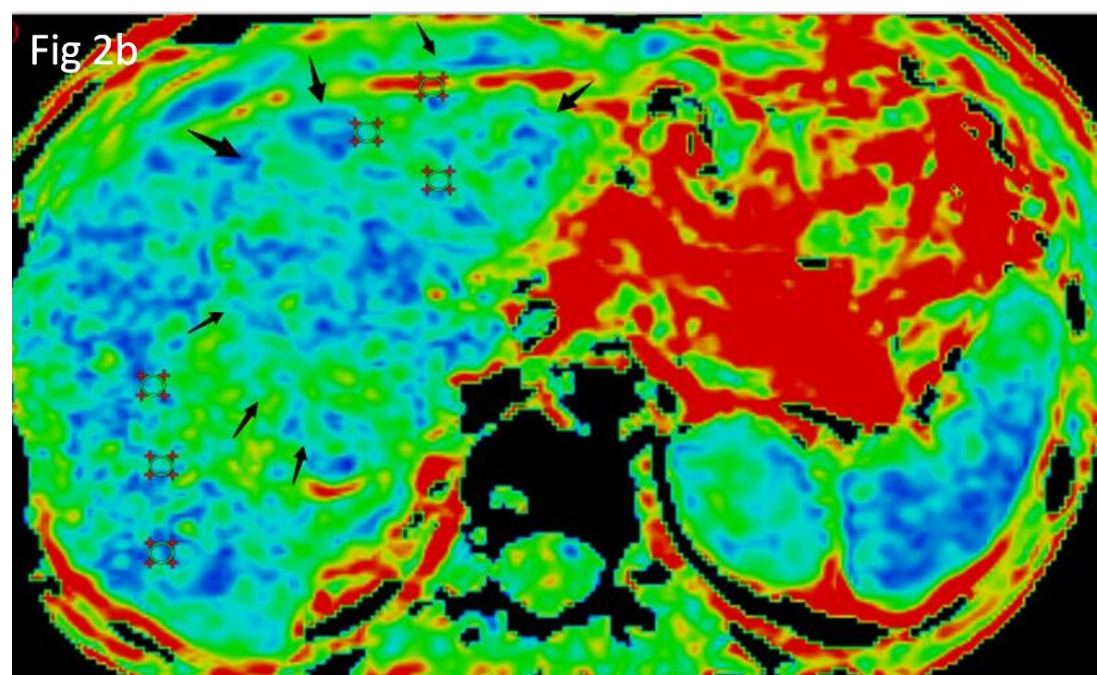

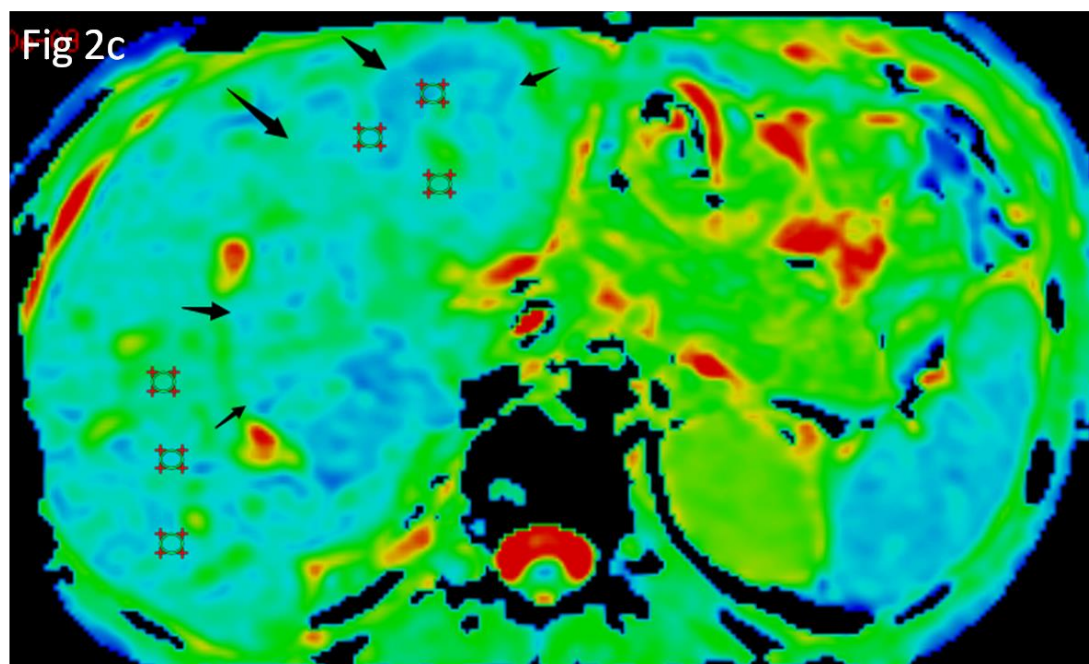

Supplement: S2 (10.1371/journal.pone.0135568.s002) [file journal.pone.0135568.s002]
