# Supplementary material for: Preliminary Study of MR Diffusion Tensor Imaging of the Liver for the Diagnosis of Hepatocellular Carcinoma
Source: PLOS journal article supplement (doi:10.1371/journal.pone.0135568), 2015-08-28

**Fig 5. Results of the direct comparisons with different b-values and NED in liver ADC.**

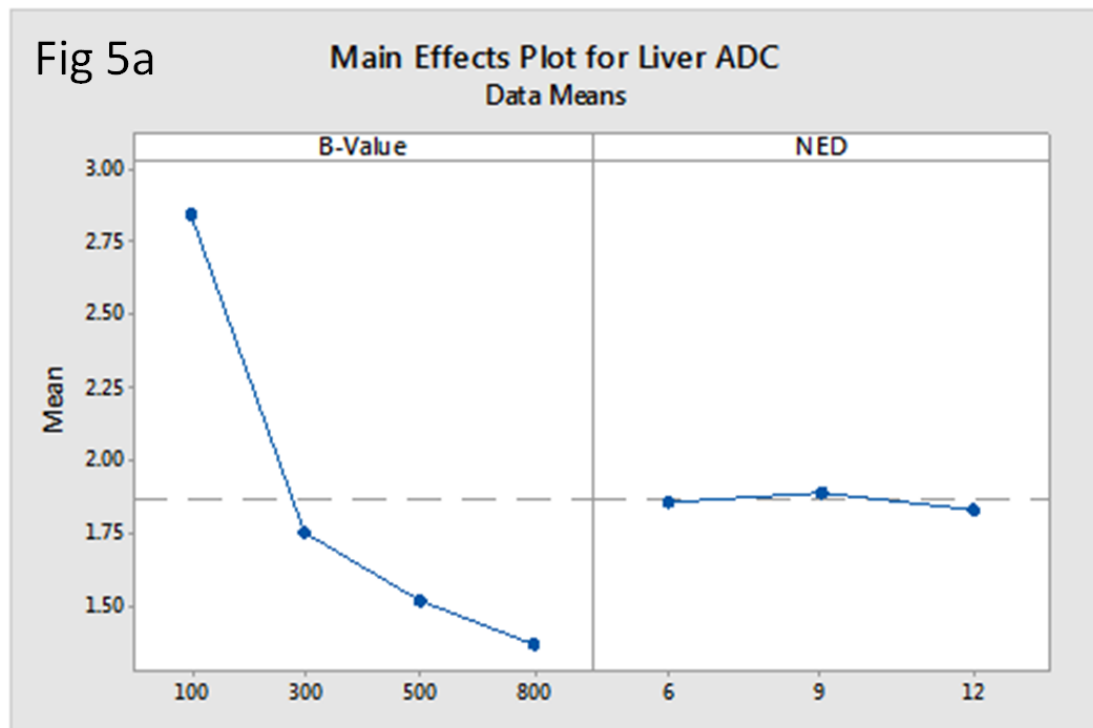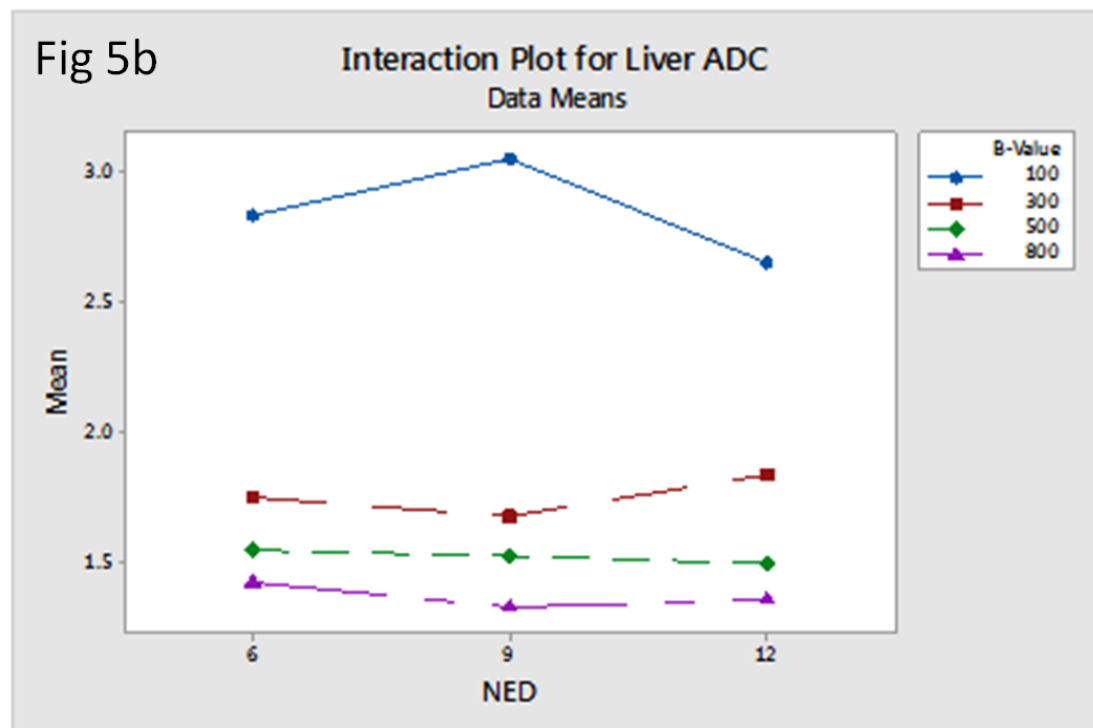

Supplement: S5 (10.1371/journal.pone.0135568.s005) [file journal.pone.0135568.s005]
